# Supplementary material for: Occurrence of slow relaxation of the magnetization in a family of copper(ii)/manganese(ii) quasi-isotropic complexes with different ground spin states
Source: Royal Society of Chemistry journal article supplement (doi:10.1039/d2dt02807g), 2022-01-01
Supplement: d2dt02807g1.pdf [file d2dt02807g1.pdf]

Electronic Supplementary Material (ESI) for Dalton Trans.

*"Occurrence of slow relaxation of the magnetization in a family of copper(II)/manganese(II) quasi-isotropic complexes with different ground spin states."*

**Evangelos Pilichos,<sup>a</sup> Mercè Font-Bardia,<sup>b</sup> Albert Escuer,<sup>a,c\*</sup> Júlia Mayans,<sup>a,c\*</sup>**

<sup>a</sup> Departament de Química Inorgànica i Orgànica, Secció Inorgànica, Martí i Franquès 1-11, Barcelona-08028, Spain.

<sup>b</sup> Departament de Mineralogia, Cristal·lografia i Dipòsits Minerals, Universitat de Barcelona, Martí Franquès s/n, 08028 Barcelona (Spain) and Unitat de Difracció de R-X. Centre Científic i Tecnològic de la Universitat de Barcelona (CCiTUB), Solé i Sabarís 1-3. 08028 Barcelona.

<sup>c</sup> Institute of Nanoscience and Nanotechnology (IN<sup>2</sup>UB), Universitat de Barcelona.

**1- IR spectra.**

**Fig. S1.** IR spectra for **1-5**.

**2- Structural aspects.**

**Table S1.** Crystal data and structure refinement for complexes **1 - 5**.

**Fig. S2.** Coordination environment for the Mn<sup>II</sup> cation in complexes **2-5**.

**Table S2.** Relevant donor-acceptor distances (Å) and donor-H···acceptor angles for the H-bonds present in complexes **1, 3, 4** and **5**.

**3- Magnetic data.**

**Fig. S3.**  $\chi_M''$  dependence of the transverse field for complexes **2** (top), **3** (middle) and **5** (bottom).

**Fig. S4.** Plot of  $\ln(1/2\pi\nu)$  vs.  $T^{-1}$  from the  $\chi_M''(T)$  data for complexes **2, 3** and **5**.

**Fig. S5.**  $\chi_M''(T)$  for complexes **2, 3** and **5** showing the lower frequencies and high frequencies out-of-phase response.

**Fig. S6.** Cole-Cole plots for complexes **2, 3** and **5**.

## 1- IR spectra.

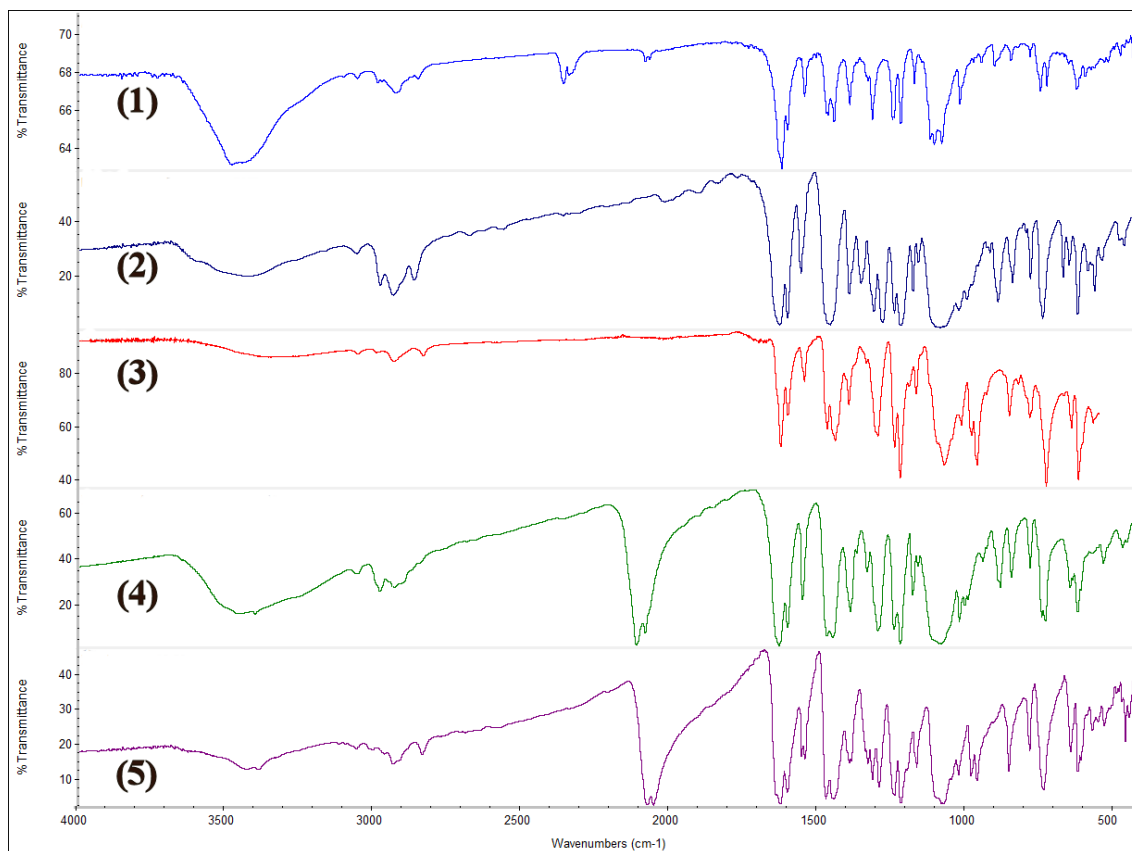

**Fig. S1.** IR spectra for complexes **1** - **5**. Characteristic bands: st. C-H 3000-2800 cm<sup>-1</sup>; N=C iminic ~1600 cm<sup>-1</sup>; C-O st. ClO<sub>4</sub><sup>-</sup> 1075 cm<sup>-1</sup>; δ ClO<sub>4</sub><sup>-</sup> 620 cm<sup>-1</sup>. Stretching for the azido ligands for **4** and **5** appears between 2050-2100 cm<sup>-1</sup>. **2RR** and **2SS** exhibit superimposable spectra and only one spectrum is shown.

## 2-Structural aspects.

**Table S1.** Crystal data and structure refinement for complexes **1** - **5**.

|                                            | <b>1</b>                                                                | <b>2SS</b><br>2CH <sub>2</sub> Cl <sub>2</sub> ·0.5MeOH                                                             | <b>3</b> ·MeOH                                                                                      | <b>4</b> ·2MeOH                                                                                                     | <b>5</b>                                                                                                                           |
|--------------------------------------------|-------------------------------------------------------------------------|---------------------------------------------------------------------------------------------------------------------|-----------------------------------------------------------------------------------------------------|---------------------------------------------------------------------------------------------------------------------|------------------------------------------------------------------------------------------------------------------------------------|
| Formula                                    | C <sub>21</sub> H <sub>26</sub> ClCu<br>N <sub>2</sub> NaO <sub>9</sub> | C <sub>101</sub> H <sub>128</sub> Cl <sub>8</sub> Cu <sub>4</sub><br>Mn <sub>2</sub> N <sub>8</sub> O <sub>35</sub> | C <sub>56</sub> H <sub>66</sub> Cl <sub>2</sub> Cu <sub>3</sub><br>MnN <sub>6</sub> O <sub>24</sub> | C <sub>82</sub> H <sub>100</sub> Cl <sub>2</sub> Cu <sub>4</sub><br>Mn <sub>2</sub> N <sub>14</sub> O <sub>28</sub> | C <sub>74</sub> H <sub>80</sub> Cl <sub>2</sub> Cu <sub>4</sub><br>Mn <sub>2</sub> N <sub>20</sub> Na <sub>2</sub> O <sub>26</sub> |
| FW                                         | 572.42                                                                  | 2661.75                                                                                                             | 1523.60                                                                                             | 2164.69                                                                                                             | 2146.5                                                                                                                             |
| System                                     | Monoclinic                                                              | Triclinic                                                                                                           | Monoclinic                                                                                          | Triclinic                                                                                                           | Triclinic                                                                                                                          |
| Space group                                | P21/c                                                                   | P 1                                                                                                                 | P21/c                                                                                               | P-1                                                                                                                 | P-1                                                                                                                                |
| <i>a</i> /Å                                | 8.0671(4)                                                               | 12.2722(6)                                                                                                          | 15.4787(6)                                                                                          | 9.876(1)                                                                                                            | 12.3500(6)                                                                                                                         |
| <i>b</i> /Å                                | 21.2492(9)                                                              | 14.5327(7)                                                                                                          | 22.7556(9)                                                                                          | 14.787(2)                                                                                                           | 13.0272(7)                                                                                                                         |
| <i>c</i> /Å                                | 14.0782(7)                                                              | 17.2926(8)                                                                                                          | 17.7148(7)                                                                                          | 16.663(2)                                                                                                           | 13.9308(7)                                                                                                                         |
| <i>α</i> /deg.                             | 90                                                                      | 101.148(2)                                                                                                          | 90                                                                                                  | 73.292(5)                                                                                                           | 107.897(2)                                                                                                                         |
| <i>β</i> /deg.                             | 103.285(2)                                                              | 100.531(2)                                                                                                          | 97.002(1)                                                                                           | 83.822(5)                                                                                                           | 91.793(2)                                                                                                                          |
| <i>γ</i> /deg.                             | 90                                                                      | 111.062(2)                                                                                                          | 90                                                                                                  | 70.888(5)                                                                                                           | 94.147(2)                                                                                                                          |
| <i>V</i> /Å <sup>3</sup>                   | 2348.7(2)                                                               | 2714.5(2)                                                                                                           | 6193.1(4)                                                                                           | 2201.8(5)                                                                                                           | 2123.9(2)                                                                                                                          |
| <i>Z</i>                                   | 4                                                                       | 1                                                                                                                   | 4                                                                                                   | 1                                                                                                                   | 1                                                                                                                                  |
| <i>T</i> , K                               | 100(2)                                                                  | 100(2)                                                                                                              | 100(2)                                                                                              | 100(2)                                                                                                              | 100(2)                                                                                                                             |
| <i>λ</i> (MoK $\alpha$ ), Å                | 0.71073                                                                 | 0.71073                                                                                                             | 0.71073                                                                                             | 0.71073                                                                                                             | 0.71073                                                                                                                            |
| $\rho_{\text{calc}}$ , g·cm <sup>-3</sup>  | 1.619                                                                   | 1.628                                                                                                               | 1.634                                                                                               | 1.633                                                                                                               | 1.678                                                                                                                              |
| $\mu$ (MoK $\alpha$ ),<br>mm <sup>-1</sup> | 1.118                                                                   | 1.279                                                                                                               | 1.389                                                                                               | 1.376                                                                                                               | 1.435                                                                                                                              |
| Flack param.                               | ----                                                                    | 0.02(1)                                                                                                             | ----                                                                                                | ----                                                                                                                | ----                                                                                                                               |
| <i>R</i>                                   | 0.0340                                                                  | 0.0481                                                                                                              | 0.0479                                                                                              | 0.0490                                                                                                              | 0.0334                                                                                                                             |
| $\omega R^2$                               | 0.0718                                                                  | 0.1328                                                                                                              | 0.1094                                                                                              | 0.1328                                                                                                              | 0.0889                                                                                                                             |

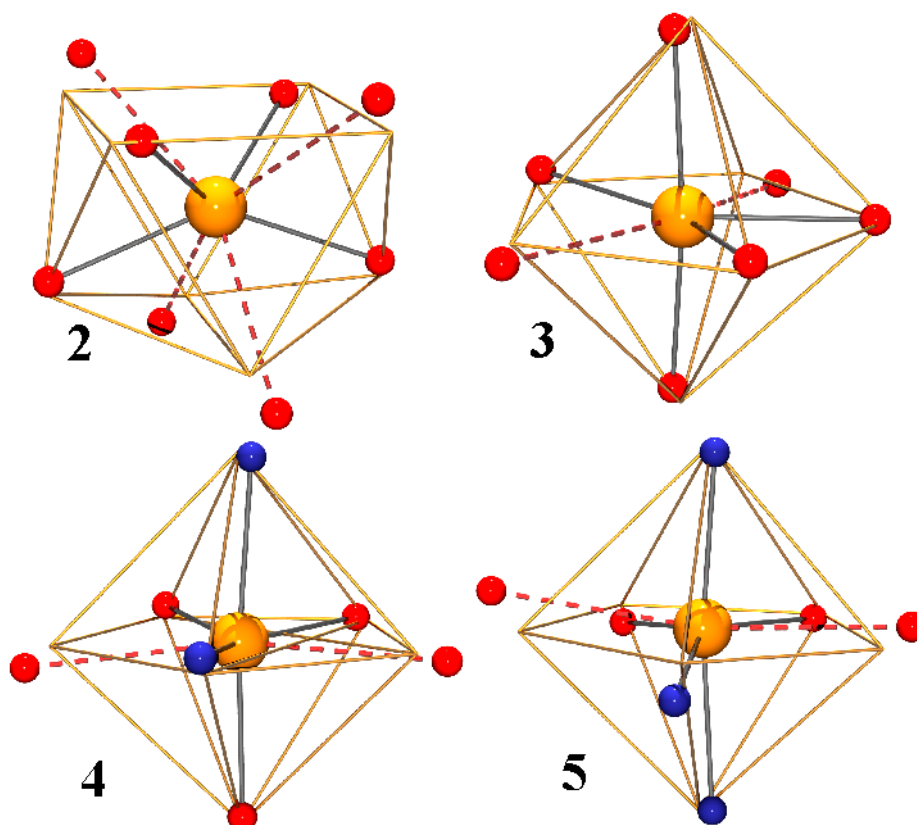

**Fig. S2.** Coordination environment for the Mn<sup>II</sup> cation in complexes **2SS**–**5**. Dashed red bonds show the large contacts Mn–O<sub>alkoxy</sub>. The ideal polyhedra (biapicited trigonal prism for **2SS** and pentagonal bipyramid for **3**–**5**) are shown in orange.

**Table S2.** Relevant donor-acceptor distances (Å) and donor-H···acceptor angles for the H-bonds present in complexes **1**, **3**, **4** and **5**. For **1** and **5** correspond to the intermolecular H-bonds that determines the 1D arrangement in the network whereas for **3** and **4** correspond to the intramolecular H-bonds between the central and the capping [CuL] fragments.

|                  | D···A (Å) |          | D-H···A (deg.) |          |                |
|------------------|-----------|----------|----------------|----------|----------------|
| Complex <b>1</b> | O9···O5'  | 2.831(2) | O9-H90···O5'   | 158.6(3) | Intermolecular |
| Complex <b>5</b> | O8···N7'  | 2.843(2) | O8-H8O···N7'   | 166(2)   |                |
| Complex <b>3</b> | O13···O9  | 2.955(4) | O13-H13B···O9  | 137(3)   | Intramolecular |
|                  | O13···O10 | 2.806(3) | O13-H13B···O10 | 148(3)   |                |
|                  | O13···O11 | 2.752(3) | O13-H13A···O11 | 157(3)   |                |
|                  | O13···O12 | 2.975(4) | O13-H13A···O12 | 129(3)   |                |
|                  | O14···O1  | 3.024(4) | O14-H14A···O1  | 140(3)   |                |
|                  | O14···O2  | 2.762(4) | O14-H14A···O2  | 148(3)   |                |
|                  | O14···O3  | 2.809(3) | O14-H14B···O3  | 153(3)   |                |
|                  | O14···O4  | 3.059(4) | O14-H14B···O4  | 132(3)   |                |
| Complex <b>4</b> | O9···O5   | 2.963(3) | O9-H9B···O5    | 138(2)   |                |
|                  | O9···O6   | 2.820(2) | O9-H9B···O6    | 150(2)   |                |
|                  | O9···O7   | 2.872(3) | O9-H9A···O7    | 135(3)   |                |
|                  | O9···O8   | 2.971(3) | O9-H9A···O8    | 154(3)   |                |

### 3-Magnetic data.

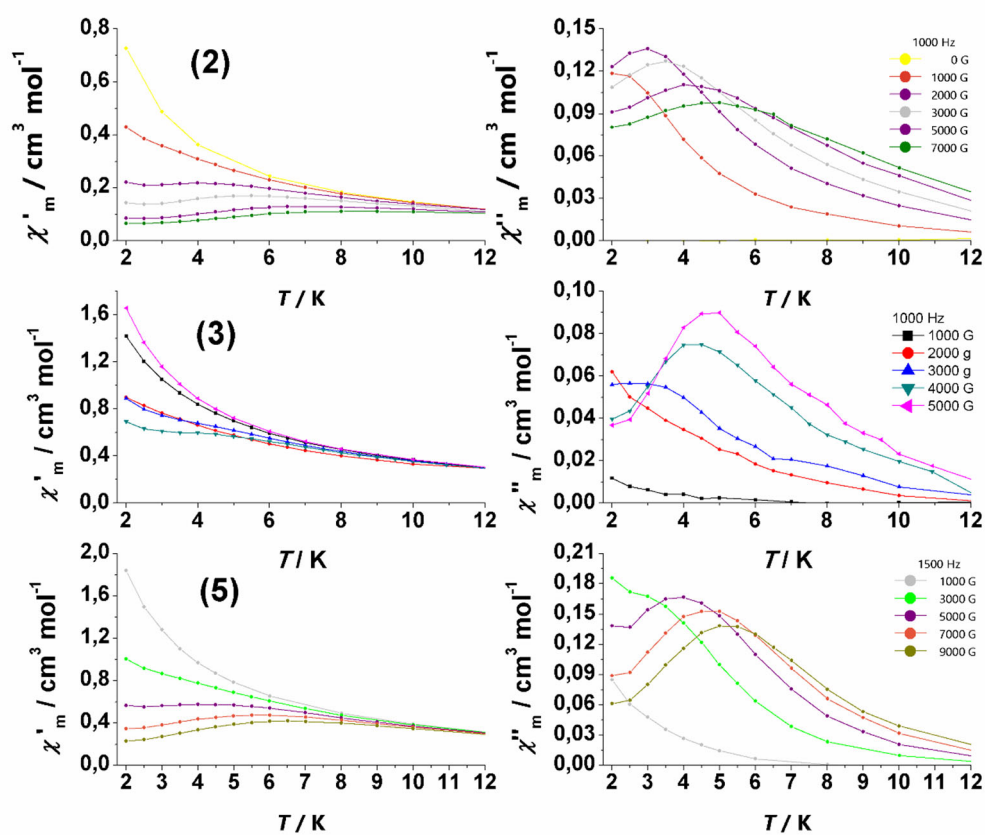

Fig. S3.  $\chi_M''$  dependence of the transverse field for complexes 2 (top), 3 (middle) and 5 (bottom).

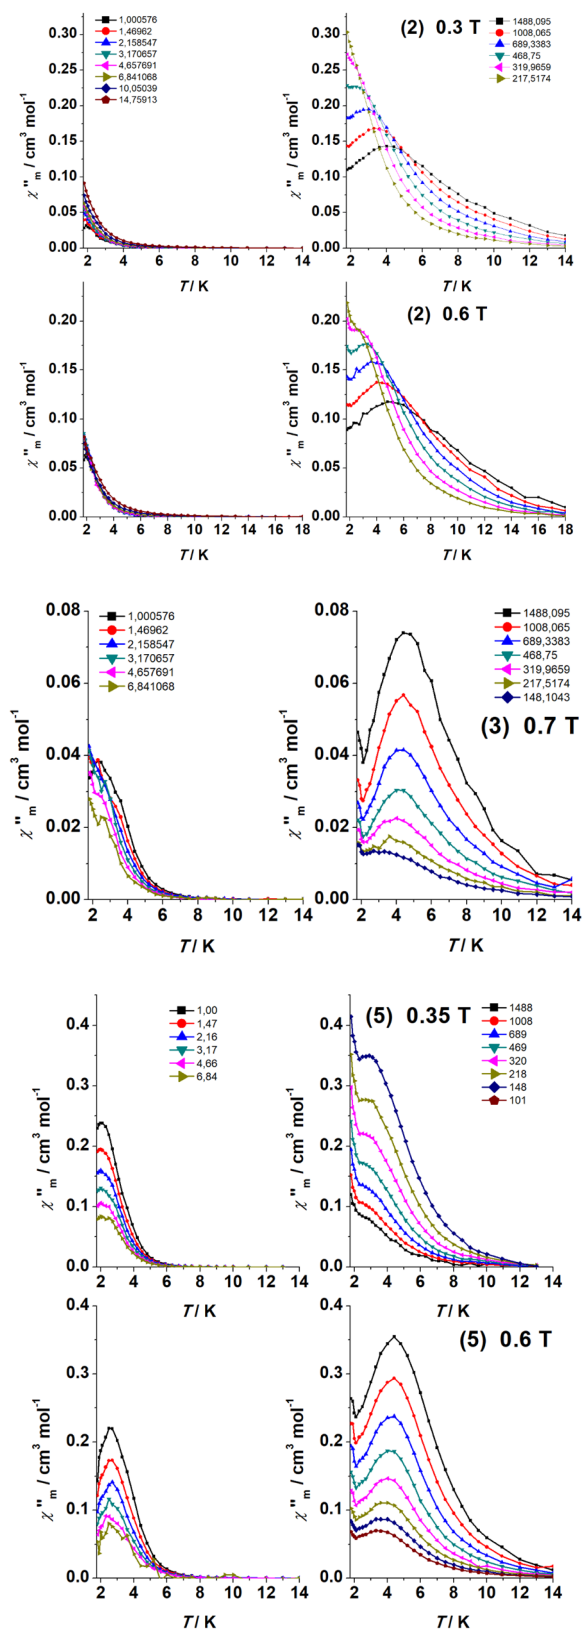

**Fig. S4.**  $\chi''_m(T)$  for complexes 2, 3 and 5 showing the lower frequencies (left) and temperature dependent high frequencies (right) out-of-phase response. For the intermediate range of frequencies maxima are not defined.

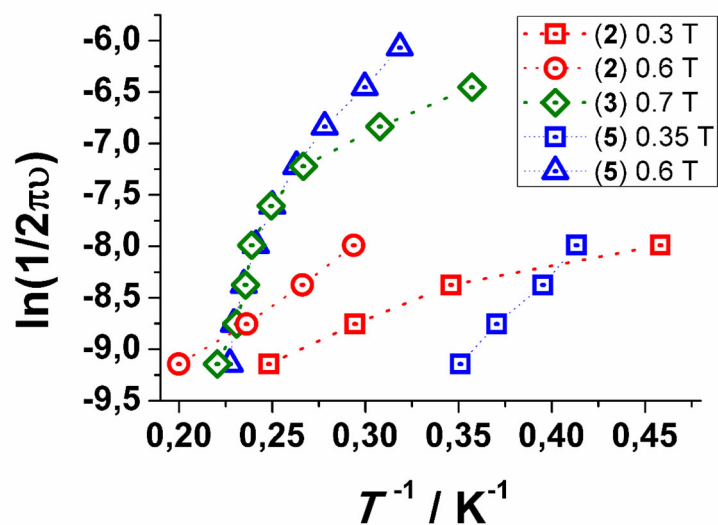

**Fig. S5.** Plot of  $\ln(1/2\pi\nu)$  vs.  $T^{-1}$  from the  $\chi_M''(T)$  data for complexes **2** (red), **3** (green) and **5** (blue). The data is limited to the HF region for which the maxima of  $\chi_M''$  can be observed.

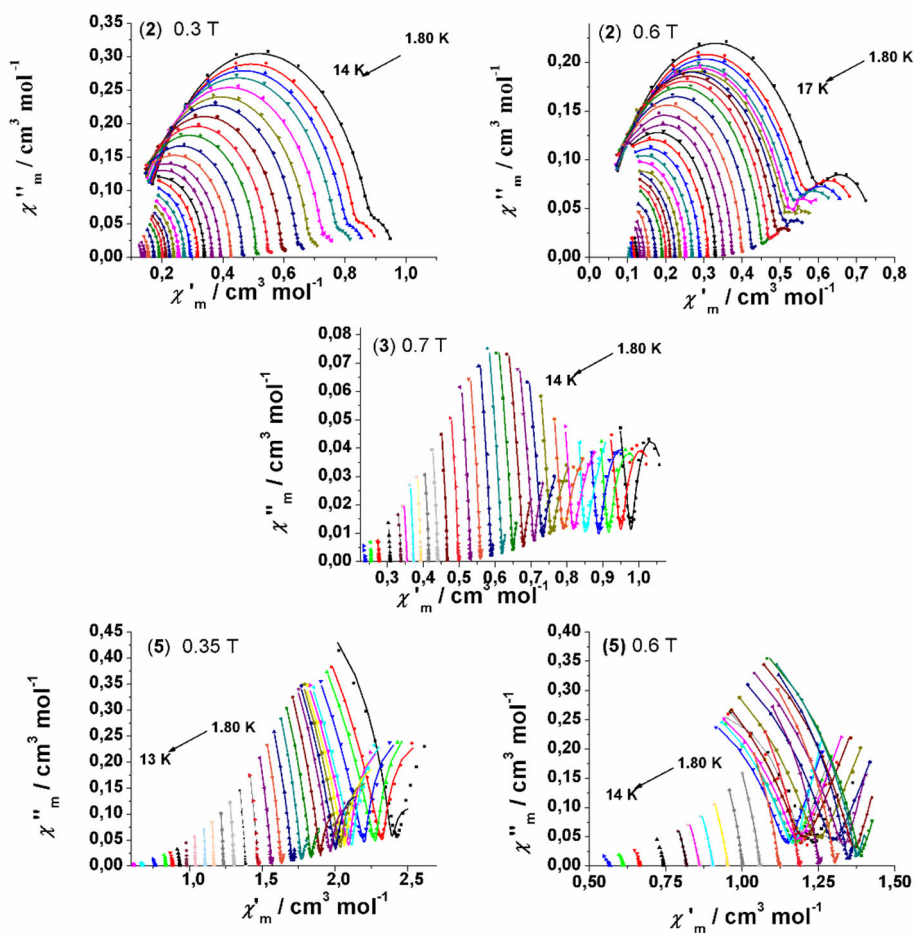

**Fig. S6.** Cole-Cole plots for complexes **2**, **3** and **5**. Solid lines show the best fit of the experimental data.
